# Supplementary material for: Reducing COVID-19 diagnostic errors with dNTPαSe supplementation
Source: Royal Society of Chemistry journal article supplement (doi:10.1039/d2an01698b), 2023-01-01
Supplement: d2an01698b1.pdf [file d2an01698b1.pdf]

## Supplementary information

Jun Zhang <sup>1,2,a</sup>, Ling Tang <sup>1,a</sup>, Dan Liu <sup>1</sup>, Shun Zhang <sup>1</sup>, Xiaoling Ding <sup>1</sup>, Guolong Gao <sup>3</sup>,  
Xiaodong Deng <sup>3</sup>, Zhengying Liu <sup>1</sup>, Xi Tian,<sup>1</sup> Wei He <sup>3\*</sup>, Bei Hu <sup>1\*</sup> and Zhen Huang <sup>1,2,\*</sup>

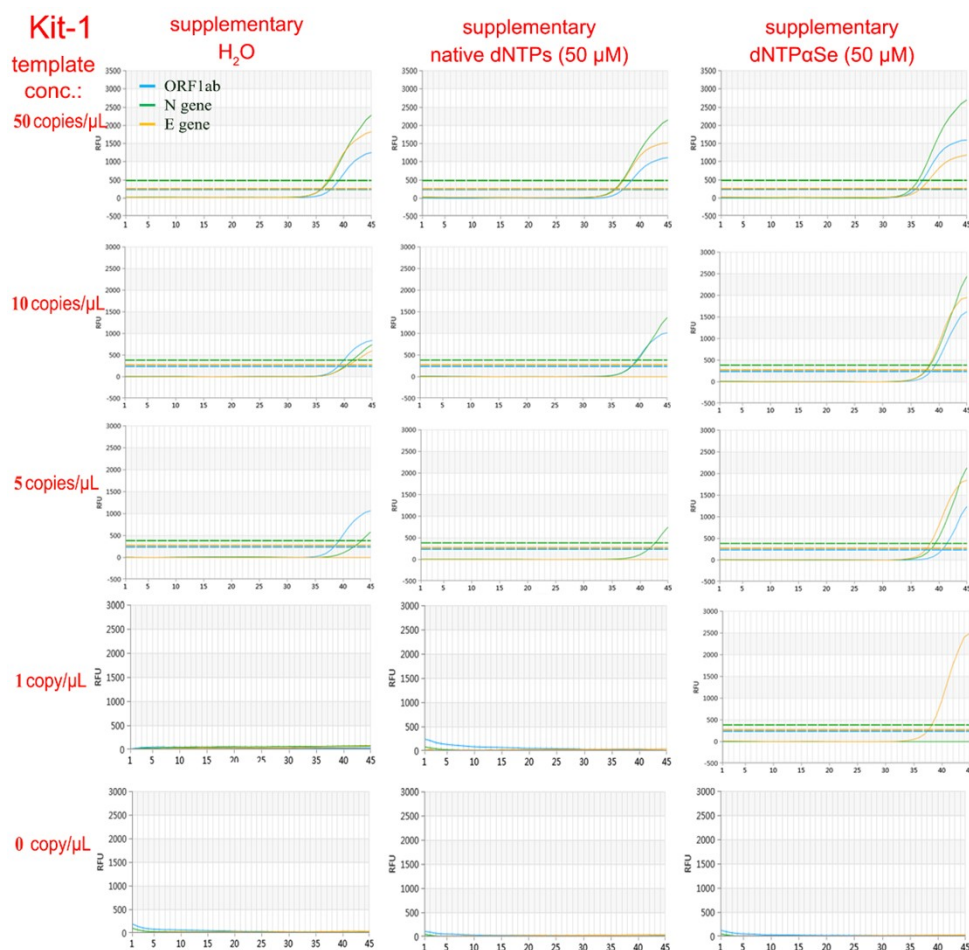

**Figure S1.** Amplification curves of the PCR reactions using Kit-1 with supplementary dNTPs or dNTP $\alpha$ Se analogues.

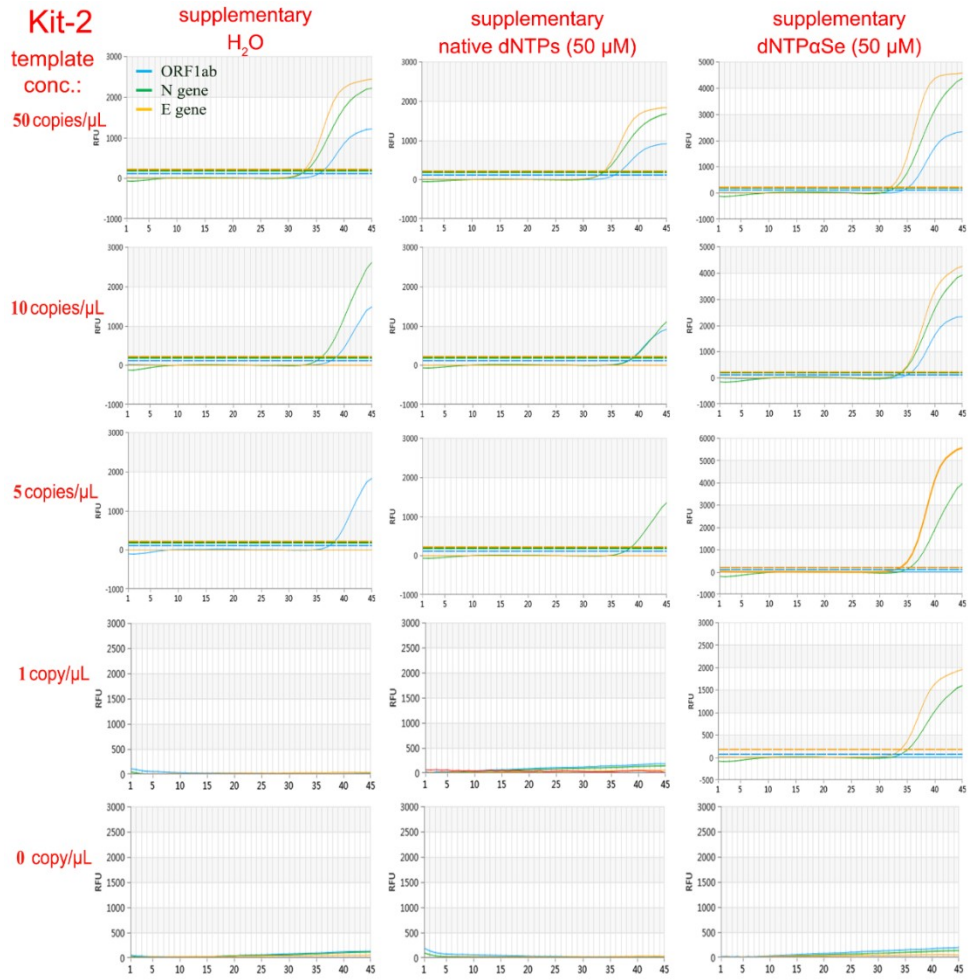

**Figure S2.** Amplification curves of the PCR reactions using Kit-2 with supplementary dNTPs or dNTPαSe analogues.

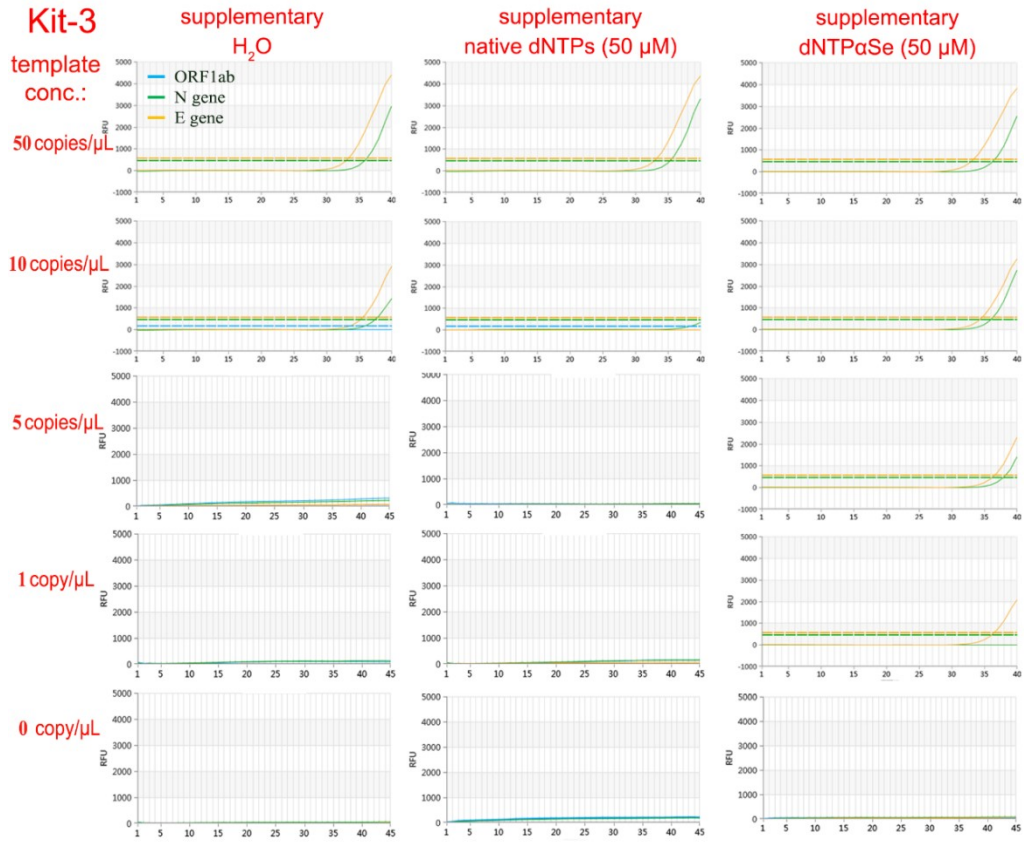

**Figure S3.** Amplification curves of the PCR reactions using Kit-3 with supplementary dNTPs or dNTPαSe analogues.

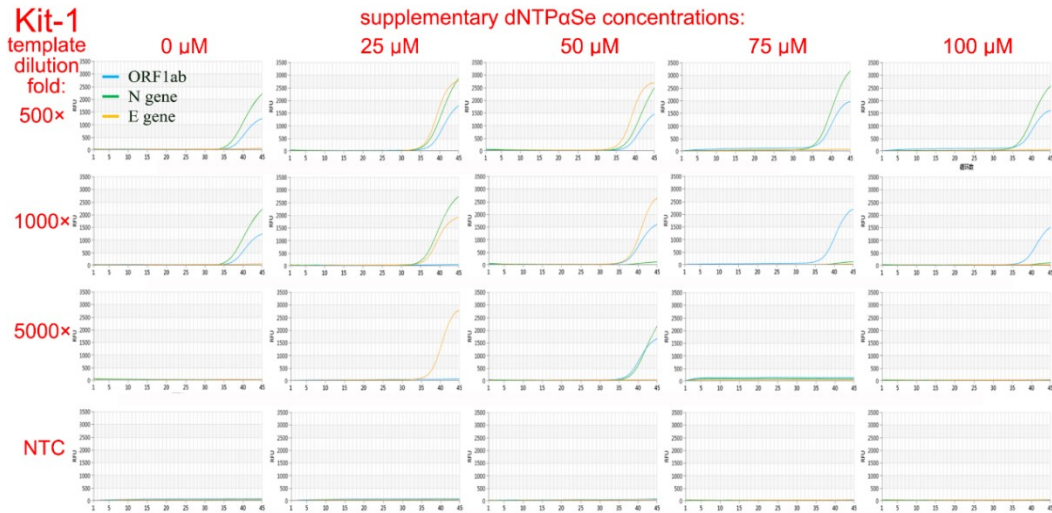

**Figure S4.** Amplification curves of the PCR reactions using Kit-1 with various quantities of dNTPαSe analogues.

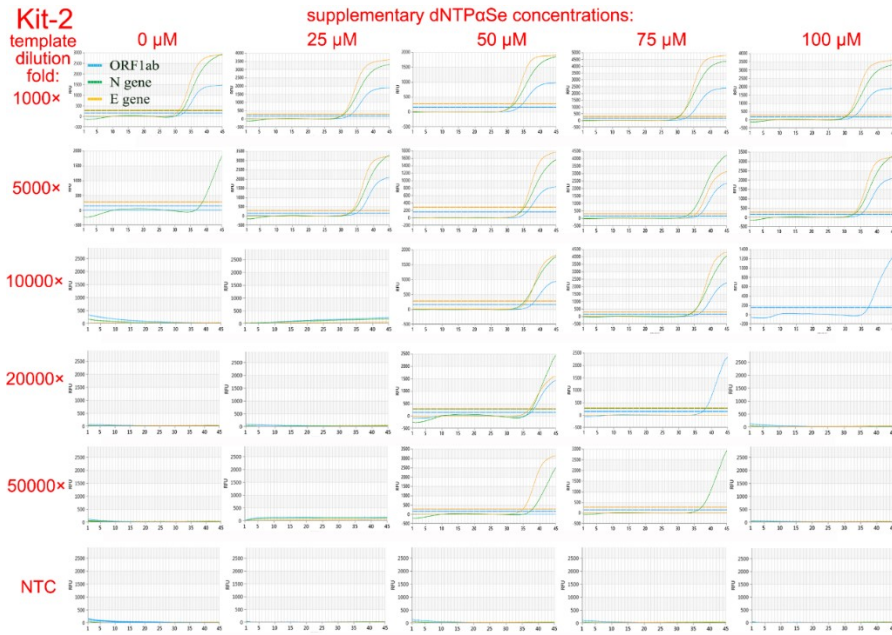

**Figure S5.** Amplification curves of the PCR reactions using Kit-2 with various quantities of dNTPαSe analogues.

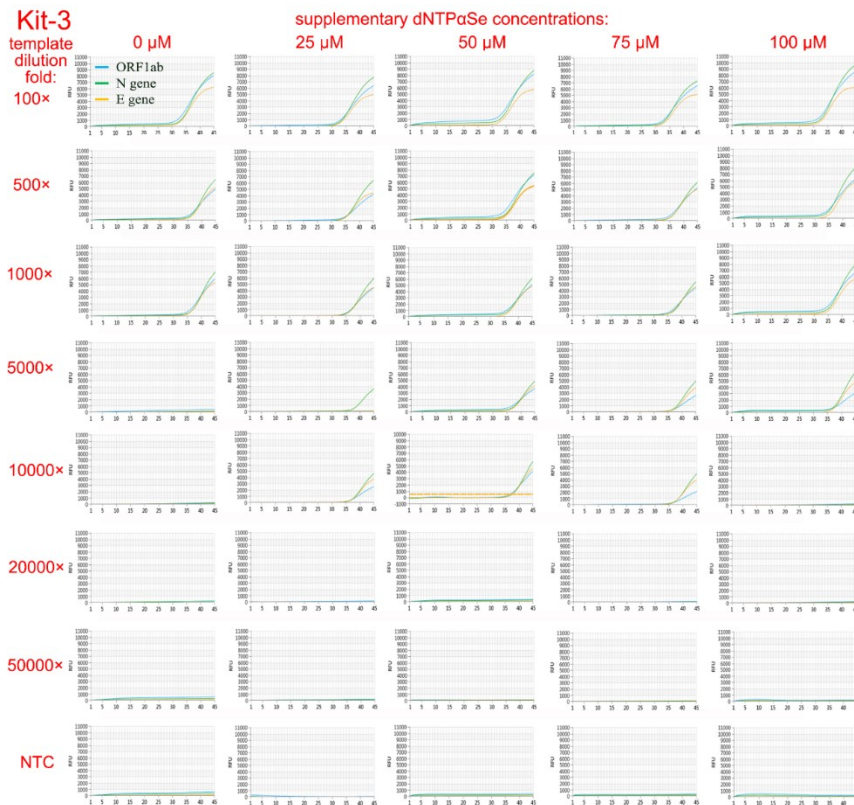

**Figure S6.** Amplification curves of the PCR reactions using Kit-3 with various quantities of dNTPαSe analogues.
